# Supplementary material for: Conductive silver patterns on polyimide substrates by using an alkali paint modification–ion exchange–reduction (AIR) process via low requirements mask technology
Source: Royal Society of Chemistry journal article supplement (doi:10.1039/c5nj03163j), 2016-01-01
Supplement: c5nj03163j1.pdf [file c5nj03163j1.pdf]

## Electronic Supplementary Information

### Conductive Silver Patterns on Polyimide Substrate by using Alkali Paint Modification – Ion Exchange – Reduction (AIR) Process via low requirements mask technology

Yanqing Wang,<sup>a</sup> Ning Li,<sup>\*a</sup> and Deyu Li<sup>a,b</sup>

*a School of Chemical Engineering & Technology, Harbin Institute of Technology, Harbin 150001, China*

*b Department of Chemical and Biological Engineering, University at Buffalo, The State University of New York, Buffalo, NY*

*14260, United States*

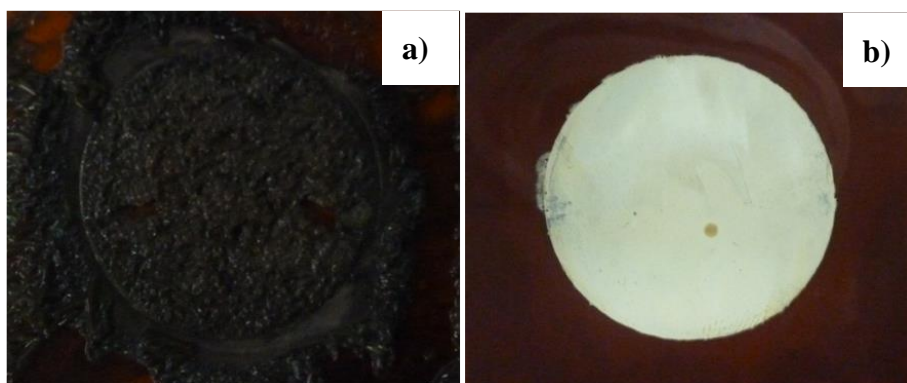

**Figure S1** The comparison of the digital photograph of the circular ( $\Phi 3\text{cm}$ ) silver pattern fabricated by the traditional ion exchange selfmetallization method and AIR method under the same condition. (a) the traditional ion exchange selfmetallization method. (b) AIR method. Note: (a) 33.3mass% KOH Aqueous solution.(the polyimide film covered by the mask was immersed in solution to finish the modification). (b) Alkali paint in Experimental Section. The preparation process of both method is the same as Experimental Section.
